# Supplementary material for: Volatile Resistive Switching Characteristics of Pt/HfO2/TaOx/TiN Short-Term Memory Device
Source: MDPI journal article supplement (doi:10.3390/met11081207), 2021-07-29
Supplement: s1 [file s1]

## Article

# Volatile Resistive Switching Characteristics of Pt/HfO<sub>2</sub>/TaO<sub>x</sub>/TiN Short-Term Memory Device

Hojeong Ryu and Sungjun Kim\*

Division of Electronics and Electrical Engineering, Dongguk University, Seoul 04620, South Korea; hojeong.ryu95@gmail.com

\* Correspondence: sungjun@dongguk.edu

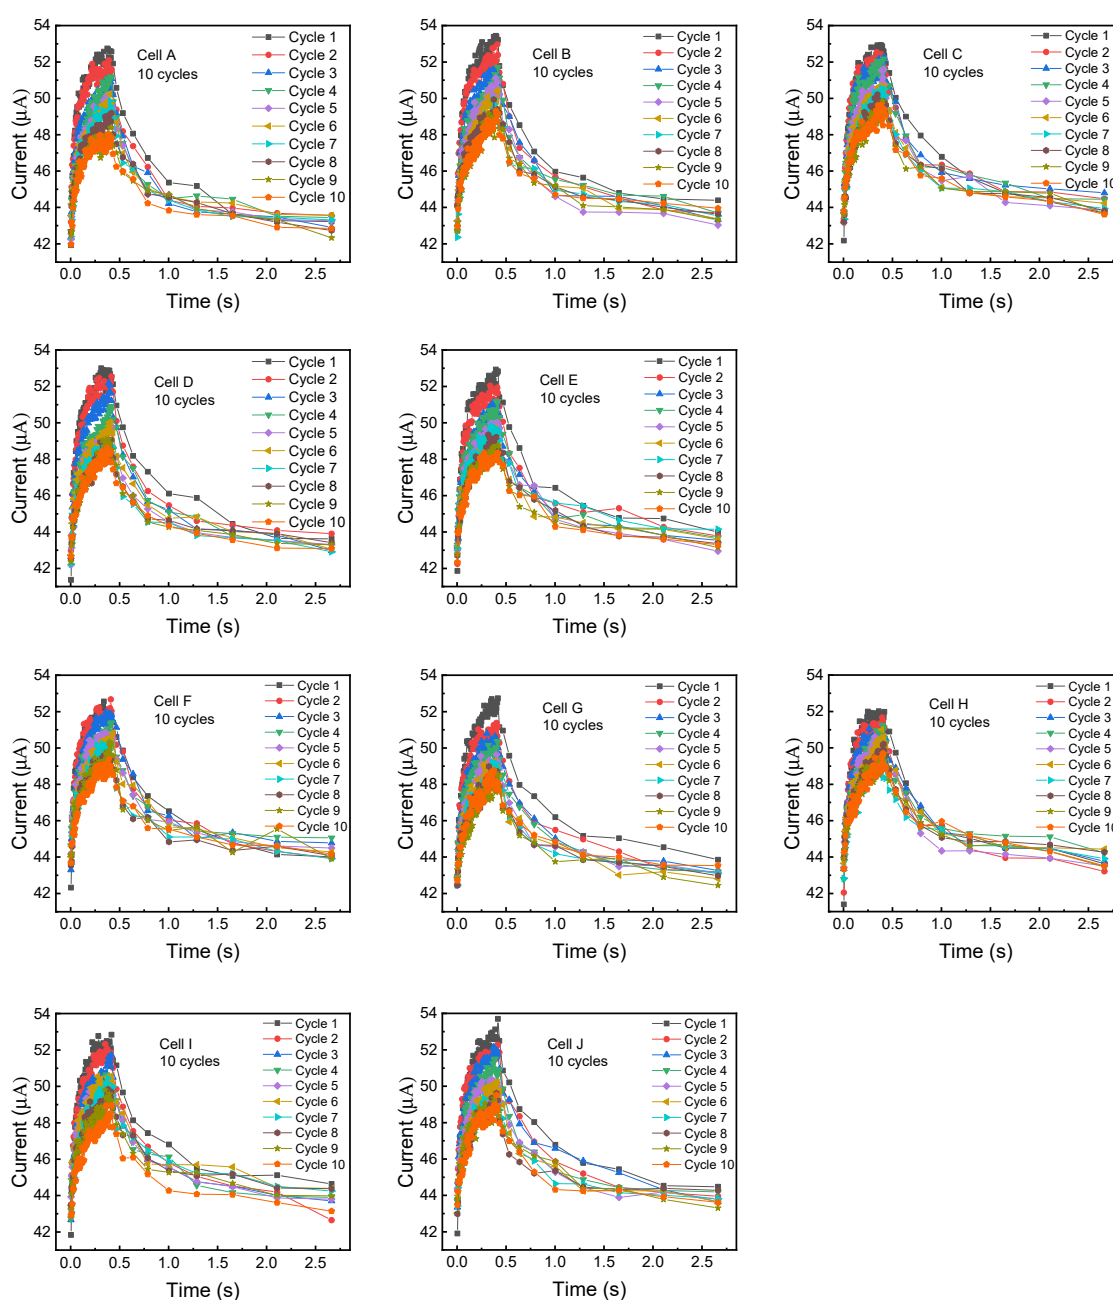

**Figure S1.** 10 cycles of 10 cells for current decay.

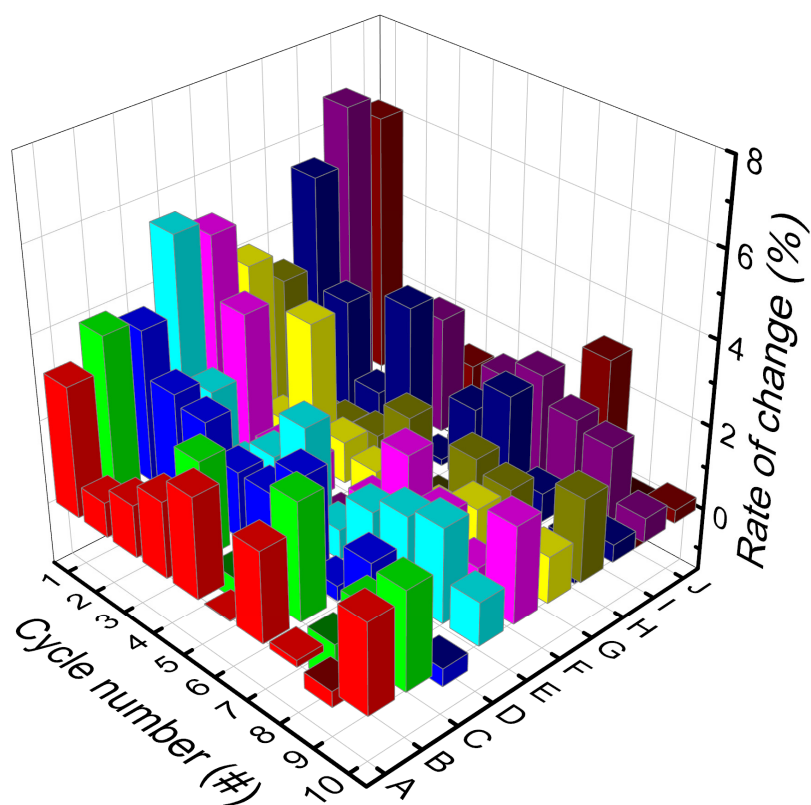

Figure S2. Change of rate for 10 cycles of 10 cells.
